# Supplementary material for: Bioactive supra decorated thiazolidine-4-carboxylic acid derivatives attenuate cellular oxidative stress by enhancing catalase activity
Source: Royal Society of Chemistry journal article supplement (doi:10.1039/d0cp00253d), 2020-01-01
Supplement: d0cp00253d1.pdf [file d0cp00253d1.pdf]

## **Bioactive Supra Decorated Thiazolidine-4-carboxylic acid derivative attenuates cellular oxidative stress by enhancing catalase activity.**

Masood Ahmad Rizvi<sup>a</sup>\*, Zakir Hussain,<sup>a</sup> Fasil Ali<sup>b</sup>, Asif Amin<sup>c</sup>, Sajjad Husain Mir,<sup>d,e</sup> Gauthier Rydzek,<sup>f</sup> Rohidas.M.Jagtap,<sup>g</sup> Satish.K.Pardeshi,<sup>g</sup> Raies A. Qadri<sup>c</sup> and Katsuhiko Ariga<sup>h,i</sup>.

### **Supporting information**

- **General Experimental Procedure** pp.2
- **Characterization Data (NMR Spectra & LCMS of TZT)** pp.3-5
- **Stern Volmer Plots/Equations used for calculations** pp.6-7
- **Scatchard plots** pp.8
- **Molecular Docking details** pp.9-10
- **Residue-wise types of interaction energy of TZT** pp.10-11
- **MTT assays** pp.11

## Synthesis of TZT {(2*S*,4*R*)-3-(tert-butoxycarbonyl)-2-(2-hydroxyphenyl) thiazolidine-4-carboxylic acid

The target synthesis of compounds **TZT** was carried out under ambient conditions. The melting points were measured in glass capillaries. The infrared spectrum (KBr disc) was obtained using a Perkin–Elmer Spectrum One FT-IR spectrometer. The <sup>1</sup>H and <sup>13</sup>C NMR spectra were recorded over a Bruker 500 MHz spectrometer (with Me<sub>4</sub>Si internal standard). The ESI-MS studies were carried out on Bruker maXis impact mass spectrometer. Solvents were purified according to standard procedures prior to use, commercially available starting materials were used as procured.

**Synthetic procedure:** The compound (**TZT**) was synthesized as per optimized procedure of our earlier work (1). At room L-Cysteine hydrochloride (0.175 g, 1.0 mmol) and NaHCO<sub>3</sub> (0.084 g, 1.0 mmol) were stirred in 40 ml of 25% aq. DMSO to a homogenous solution. Salicylaldehyde (0.122 g, 0.95mmol) was added to this clear solution and the resultant mixture was again stirred for 10h at room temperature. On completion of reaction as evidenced from TLC, reaction mixture was acidified with cold 2M HCl and extracted in ethyl acetate. The organic extract was washed with cold saturated NaHCO<sub>3</sub> and further extracted in DCM solvent. On evaporation of the organic layer a white compound was obtained which on purification over silica column was found to be a mixture of (2*R*/2*S*,4*R*)-2-(2-hydroxyphenyl) thiazolidine-4-carboxylic acid. In the second step compound a (0.225 g, 1.0 mmol) and NaHCO<sub>3</sub> (0.21 g, 2.5 mmol) were taken in a two neck round bottom flask(100 ml) and stirred in 25 ml 50% aqueous 1,4-dioxane at 0°C for 1.5 h. To this solution di-ter-butyloxycarbonyl (0.305 g, 1.4 mmol) was added in a drop wise manner, and the mixture was magnetically stirred at room temperature for 12 h. The reaction mixture was acidified by cold 2M HCl (up to pH 4.0) and extracted in ethyl acetate. The extract was washed with cold saturated NaHCO<sub>3</sub> and further extracted in DCM. The organic phase on solvent evaporation gave an oily solid which was purified over silica column using 40% ethyl acetate in hexane as eluent, yielding two diastereomer's. The major 85% was 2*S*,4*R* diastereomer (**TZT**) and minor 15% as 2*R*,4*R* diastereomer. The scheme 1 summarizes the two step synthesis of compound TZT. The TZT compound showed all major/ diagnostic spectroscopic responses {C<sub>15</sub>H<sub>19</sub>N<sub>1</sub>O<sub>5</sub>S<sub>1</sub>} white solid (85%),: IR :3097 (ν O—H), 1627 (ν C=O), 831 (ν C-S), 1097, 1093, 761 (aromatic C-H bending) cm<sup>-1</sup>, <sup>1</sup>H-NMR (DMSO-*d*<sub>6</sub>): δ 10.3 (s, 1H,broad, carboxylic acid proton), δ 7.83 (d, 1H, *J* = 8Hz, aromatic proton), δ 7.17 (t, 1H, *J* = 8Hz, aromatic proton), δ 6.83 (m, 2H,*J* = 8Hz, aromatic protons), δ 5.93 (s, 1H, H-2), δ 4.86 (q, 1H, *J* = 7.2Hz, H-4), δ, 3.43 (dd,1H, *J* = 7.2, 4.5Hz, H-5), δ 2.73 (dd, 1H, *J* = 7.2, 4.5Hz, H-5), δ 1.38 (s, 6H, HCH<sub>3</sub>C(CH<sub>3</sub>)<sub>2</sub>), δ 1.25 (s, 3H, H CH<sub>3</sub>C(CH<sub>3</sub>)<sub>2</sub>). <sup>13</sup>C NMR (DMSO-*d*<sub>6</sub>): 172.69 (C=O), 172.24 (C=O), 154.60, 130.29, 127.50, 120.47, 119.90, 115.13(C Ar), 83.35 (C C(CH<sub>3</sub>)<sub>3</sub>), 60.89 (C-2), 49.43 (C-4), (C-5, merged in DMSO-*d*<sub>6</sub> signals), 28.10 (C C(CH<sub>3</sub>)<sub>3</sub>). MS: 326.00 (M+1).

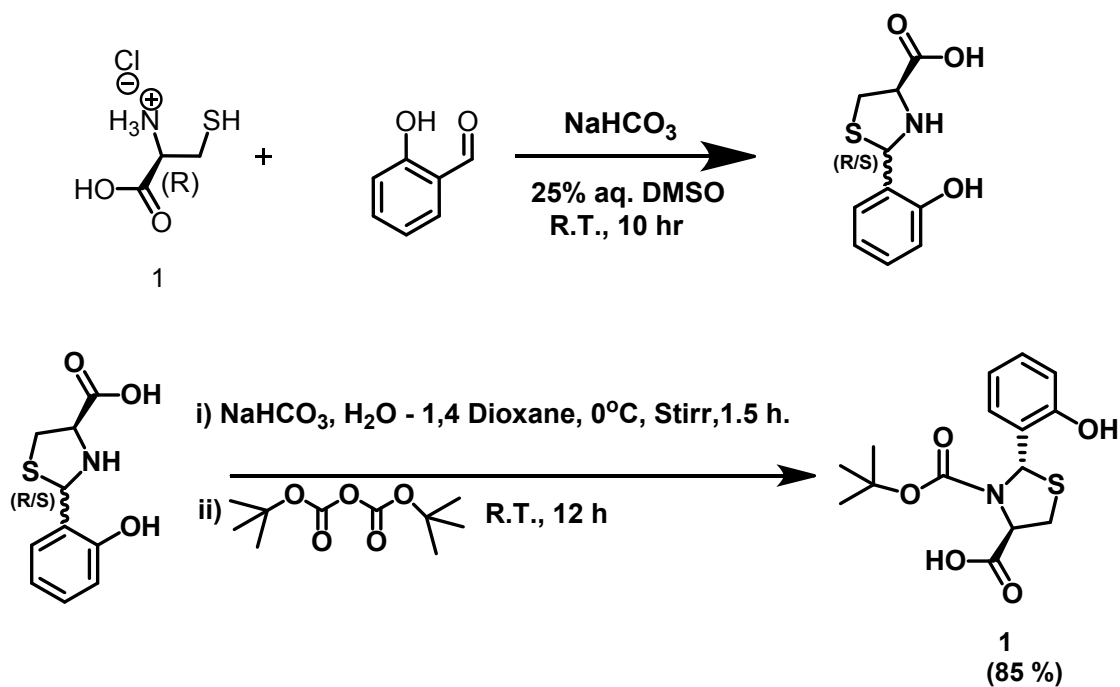

**Scheme 1: Synthesis of (2S,4R)-3-(tert-butoxycarbonyl)-2-(2-hydroxyphenyl) thiazolidine-4-carboxylic acid (TZT).**

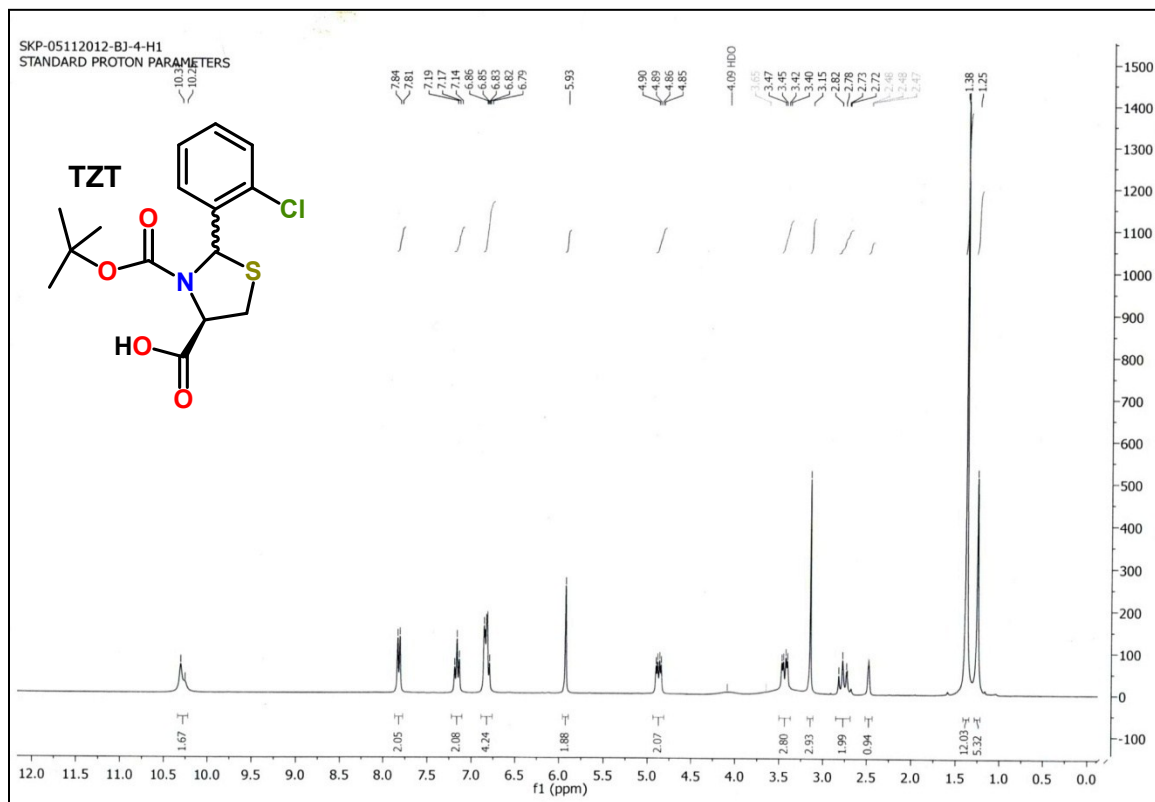

**Figure S1: <sup>1</sup>H NMR of the TZT Compound**

**<sup>13</sup>C NMR of the TZT Compound**

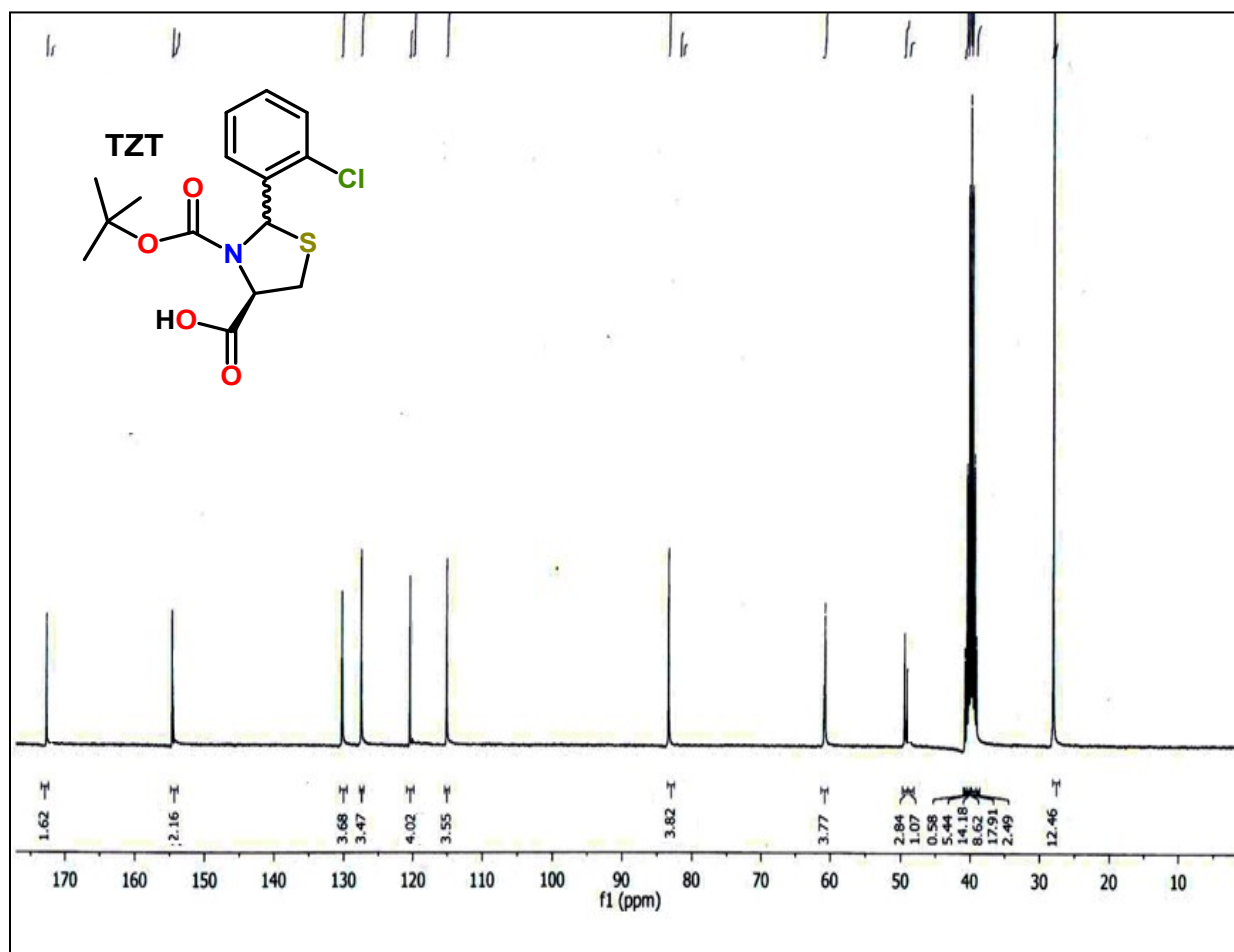

**Figure S2: <sup>13</sup>C NMR of the TZT Compound**

LCMS REPORT

Sample Information  
 Acquired by : Admin  
 Date Acquired : 11/25/2013 11:23:06 AM  
 Sample Name :  
 Sample ID : ETA

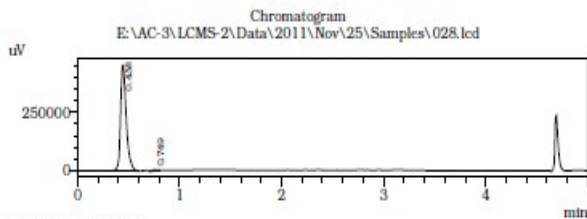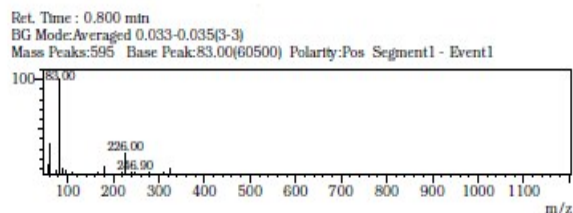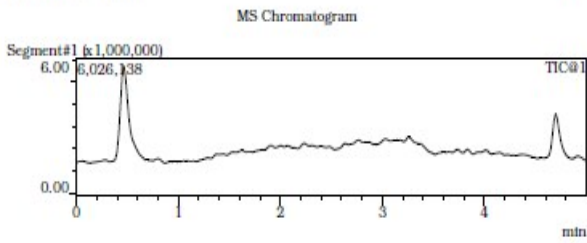

PeakTable  
 PDA.Ch1 210nm - 400nm 4nm

| Peak# | Ret. Time | Area    | Area %  |
|-------|-----------|---------|---------|
| 1     | 0.438     | 1744910 | 99.309  |
| 2     | 0.749     | 12144   | 0.691   |
| Total |           | 1757054 | 100.000 |

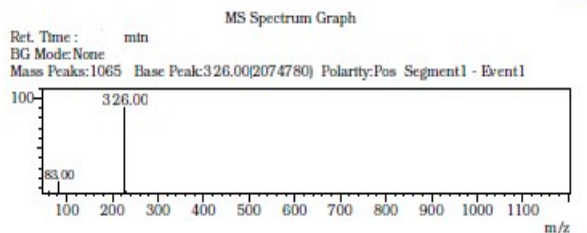

Figure S3: LCMS of the TZT Compound

**Stern Volmer Plots of BSA- TZT and BLC- TZT interaction.**

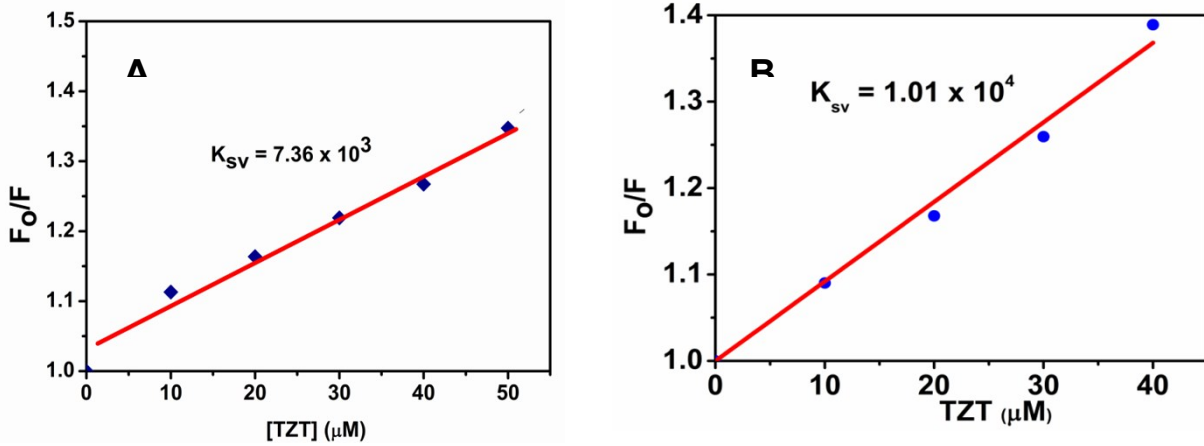

**Figure S4. The Stern Volmer plots for A: BSA –TZT and B: BLC-TZT quenching at 298 K.** The calculated Stern Volmer quenching constant for BLC-TZT quenching interaction was higher than that of TZT-BSA.

**Equations used for calculations.**

*Michaelis–Menten model of enzyme kinetics*

$$\frac{1}{V_0} = \frac{K_m}{V_{max}} \times \frac{1}{[S]} + \frac{1}{V_{max}}$$

..... S1

Where  $K_m$  is the Michaelis constant,  $V_{max}$  the maximum velocity,  $V_0$  is the initial velocity of the enzyme.  $[S]$  is substrate concentration.

*Wolfee-Shimmer equation for quantifying binding propensity of compound TZT (absorption data):*

$$\frac{A^0}{A - A^0} = \frac{\epsilon_{TZT}}{\epsilon_{TZT} - \epsilon_{Protein}} + \frac{\epsilon_{TZT}}{\epsilon_{TZT} - \epsilon_{Protein} \times Kb} \times \frac{1}{[TZT]}$$

.....S2

Where,  $A^\circ$  and  $A$  are absorbance of pure TZT and TZT–protein complex respectively at 278 nm.  $\epsilon_{TZT}$  and  $\epsilon_{TZT\text{-protein}}$  are the molar extinction coefficient of TZT alone and TZT –protein complex, respectively.

*Stern Volmer equation for Steady state fluorescence measurements*

$$\frac{F^\circ}{F} = 1 + K_{SV}[Q] = 1 + k_q\tau_0[Q] \dots\dots\dots S3$$

Where  $F^\circ$  and  $F$  are the fluorescence intensities of proteins in the absence and presence of quencher,  $K_{SV}$  is the Stern Volmer constant,  $[Q]$  is the quencher concentration,  $k_q$  is the quenching rate constant and  $\tau_0$  is the fluorescence lifetime in the absence of quencher which is  $10^{-8}$  seconds.

*Scatchard equation for the binding constant ( $K_a$ ) and number of binding sites ( $n$ ) of TZT binding*

$$\log \frac{[F^\circ - F]}{[F^\circ]} = \log K + n \log [Q] \dots\dots\dots S4$$

Where  $F_0$  and  $F$  are the fluorescence intensities of protein in absence and presence of TZT quencher  $[Q]$ ,  $K$  and  $n$  are the binding constant and the number of binding sites, respectively.

Van't Hoff's equation for determination of enthalpy change ( $\Delta H$ ) of TZT binding.

$$\ln \left[ \frac{K_2}{K_1} \right] = \left( \frac{1}{T_a} - \frac{1}{T_b} \right) \frac{\Delta H}{R} \dots\dots\dots S5$$

Where  $K_2$  and  $K_1$  are Stern Volmer constants at temperatures “a” and “b” respectively.  $\Delta H$  is the enthalpy change of TZT binding with proteins (BSA and BLC) and “R” is molar as constant.

$$\Delta G = - nRT \ln K = \Delta H - T \Delta S \dots\dots\dots S6$$

$$\Delta S_{total} = \Delta S_{conf} + \Delta S_{solv.} + \Delta S_{r/t} \dots\dots\dots S7$$

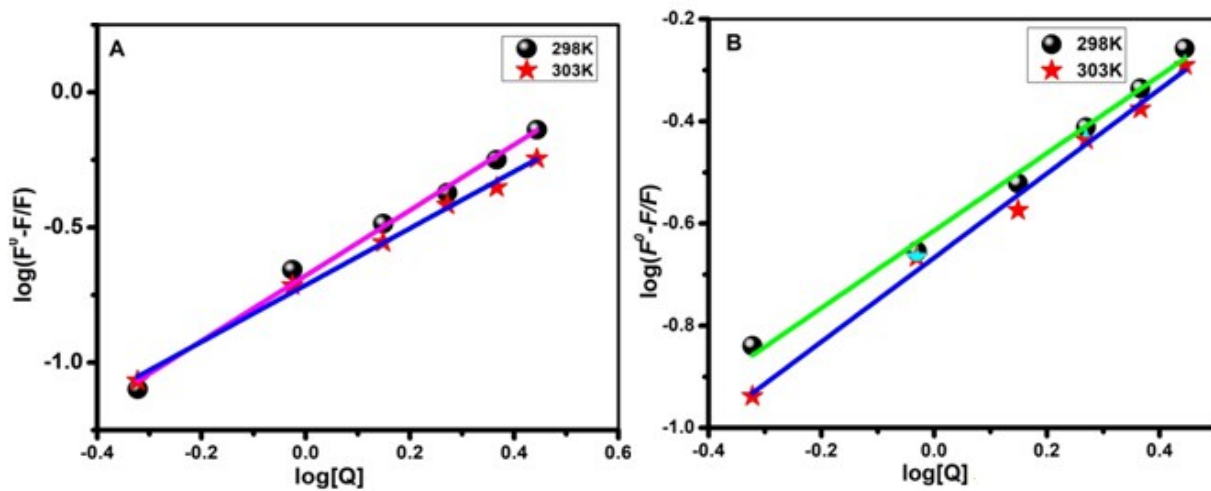

Figure S5: Scatchard plots for BSA-TZT (A) and BLC-TZT (B) used to calculate the binding numbers and binding constants of TZT with target proteins.



## Molecular Docking investigation of TZT protein interaction:

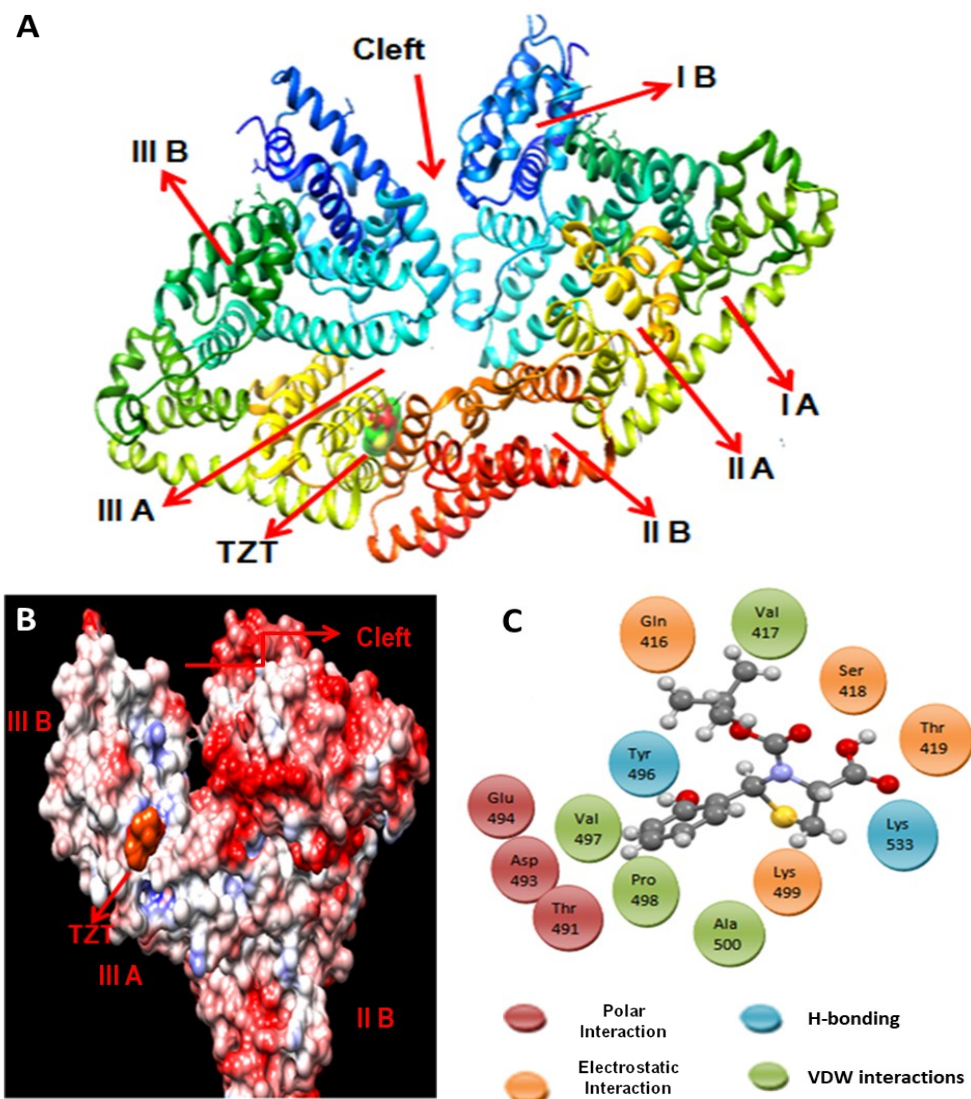

**Figure S6: Molecular docking of TZT interaction with BSA.** Ribbon representation of optimum docked binding site of TZT with BSA (A). Coulombic surface model of binding site (B). Schematic representation of TZT non-covalent interactions with amino acid residues from BSA in its binding pocket.

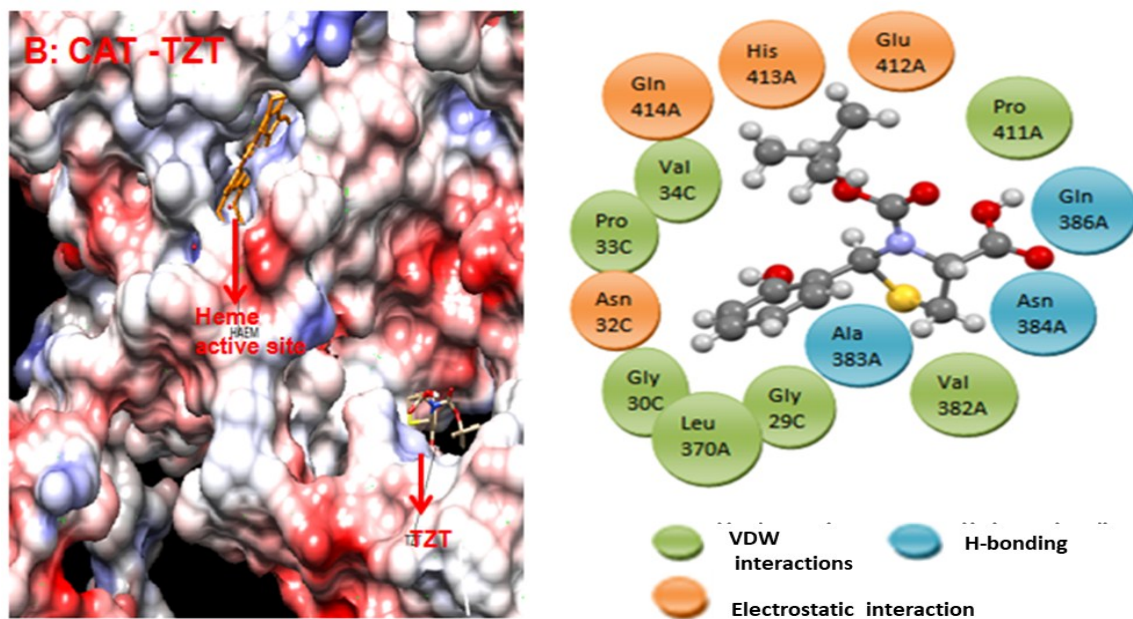

**Figure S7: Molecular docking of TZT interaction with BLC.** Coulombic surface model of binding site and schematic representation of TZT non-covalent interactions with amino acid residues from BLC in its binding pocket.

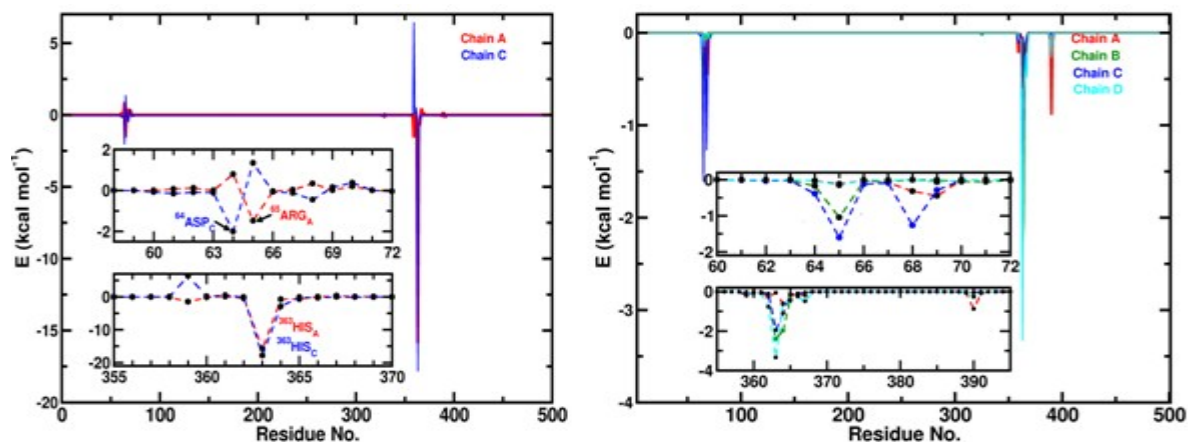

**Figure S8: Residue-wise electrostatic interaction energy of chain A and chain C of BLC with TZT molecule (A). Residue-wise VDW interaction energy of all chains of BLC with TZT molecule (B).**

**Table S-1.** Average electrostatic and VDW interaction energy between different chains of BLC and TZT. Standard deviation is shown in brackets.

| Chain type | Electrostatic energy (Kcal.mol <sup>-1</sup> ) | VDW energy (Kcal.mol <sup>-1</sup> ) |
|------------|------------------------------------------------|--------------------------------------|
| Chain A    | -18.48 (2.81)                                  | -3.46 (1.87)                         |
| Chain B    | -2.75 (2.32)                                   | -6.32 (1.01)                         |
| Chain C    | -15.26 (2.8)                                   | -7.51 (2.1)                          |
| Chain D    | -3.45 (1.97)                                   | -6.54 (1.57)                         |

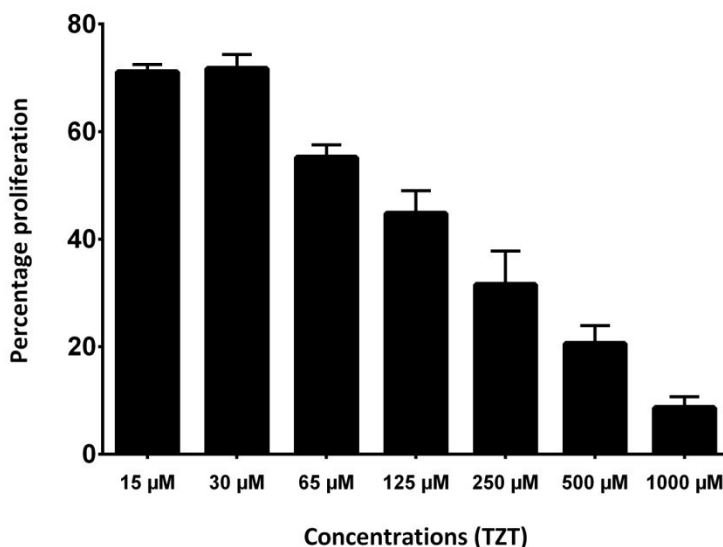

**Figure S9 Effect of TZT on the proliferation of A549 cells.** A549 cells were treated with various concentrations (15 μM –1000 μM) of TZT for 24 h. After 24 h, rate of cell proliferation was determined by MTT assay. Data represented as mean ± SD of results from three independent experiments.

## References:

1.R. M. Jagtap, M. A. Rizvi, Y. B. Dangat and S. K. Pardeshi, Crystal structure, computational studies, and stereoselectivity in the synthesis of 2-aryl-thiazolidine-4-carboxylic acids via in situ imine intermediate, *Journal of Sulfur Chemistry*, 2016, **37**, 401–425.

2.Y. Bai , J. Du, X. Weng, Synthesis, characterization, optical properties and theoretical calculations of 6-fluoro coumarin.*Spectrochimica Acta Part A: Molecular and Biomolecular Spectroscopy*, 2014, **126**, 14–20.

3 A. Solankee, S. Lad, G. Patel, S. Solankee, Synthesis and Antibacterial Activity of Chalcones, Aminopyrimidines and Pyrazolines. *Orient J Chem*, 2009, **1**, 25
